# Supplementary material
Source: PubMed Central journal article supplement (PMC3365417)
Supplement: emboj2012104s1.pdf [file emboj2012104s1.pdf]

Figure S1

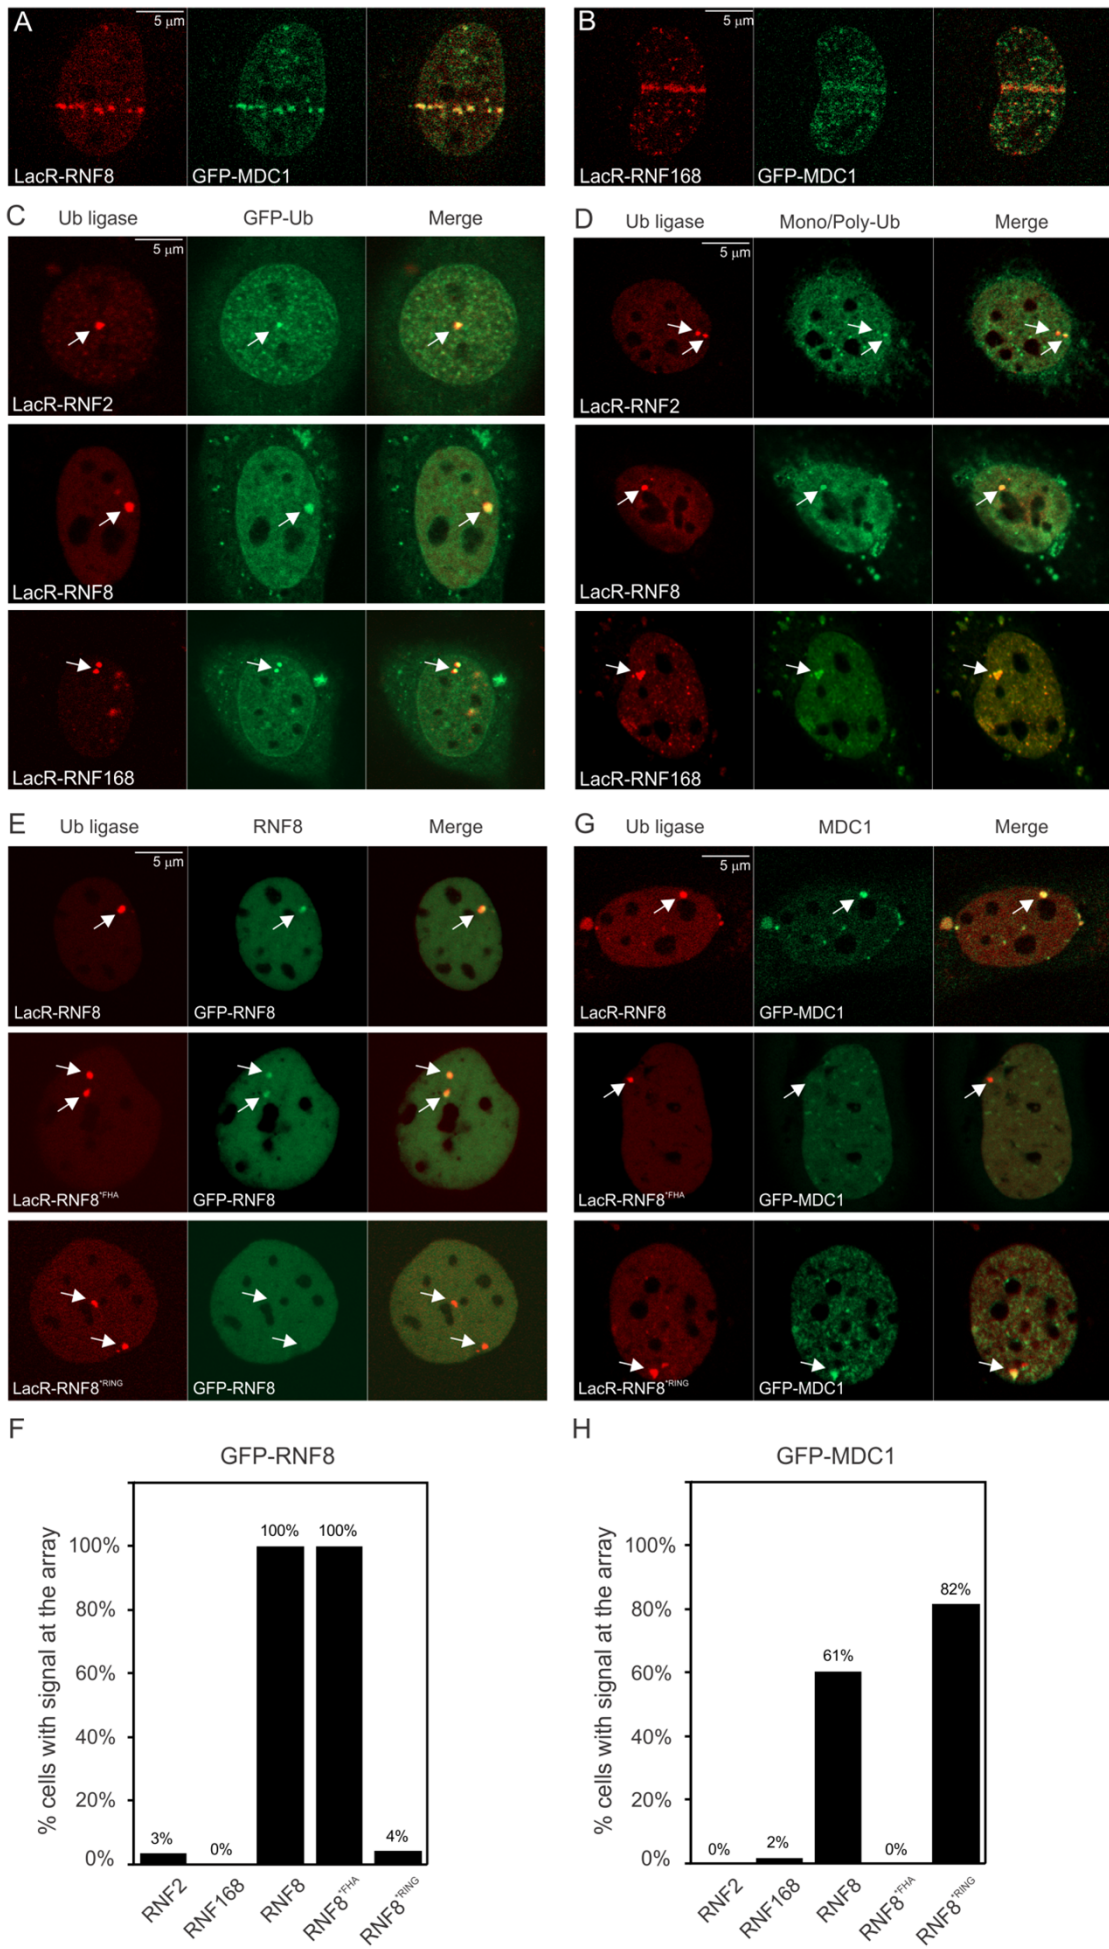

Figure S2

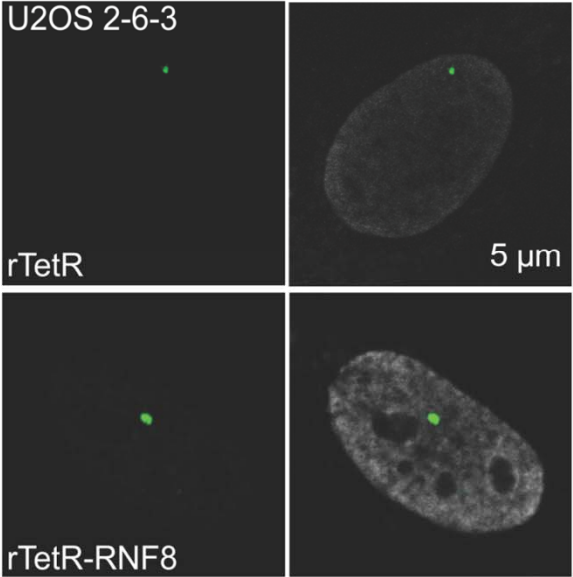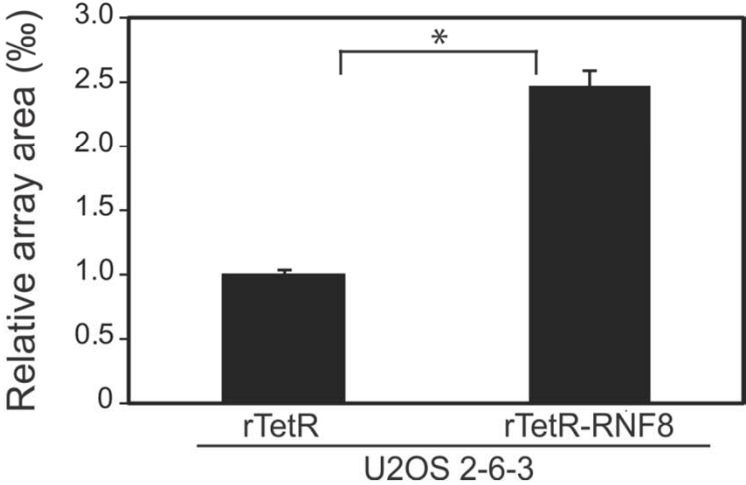

# Figure S3

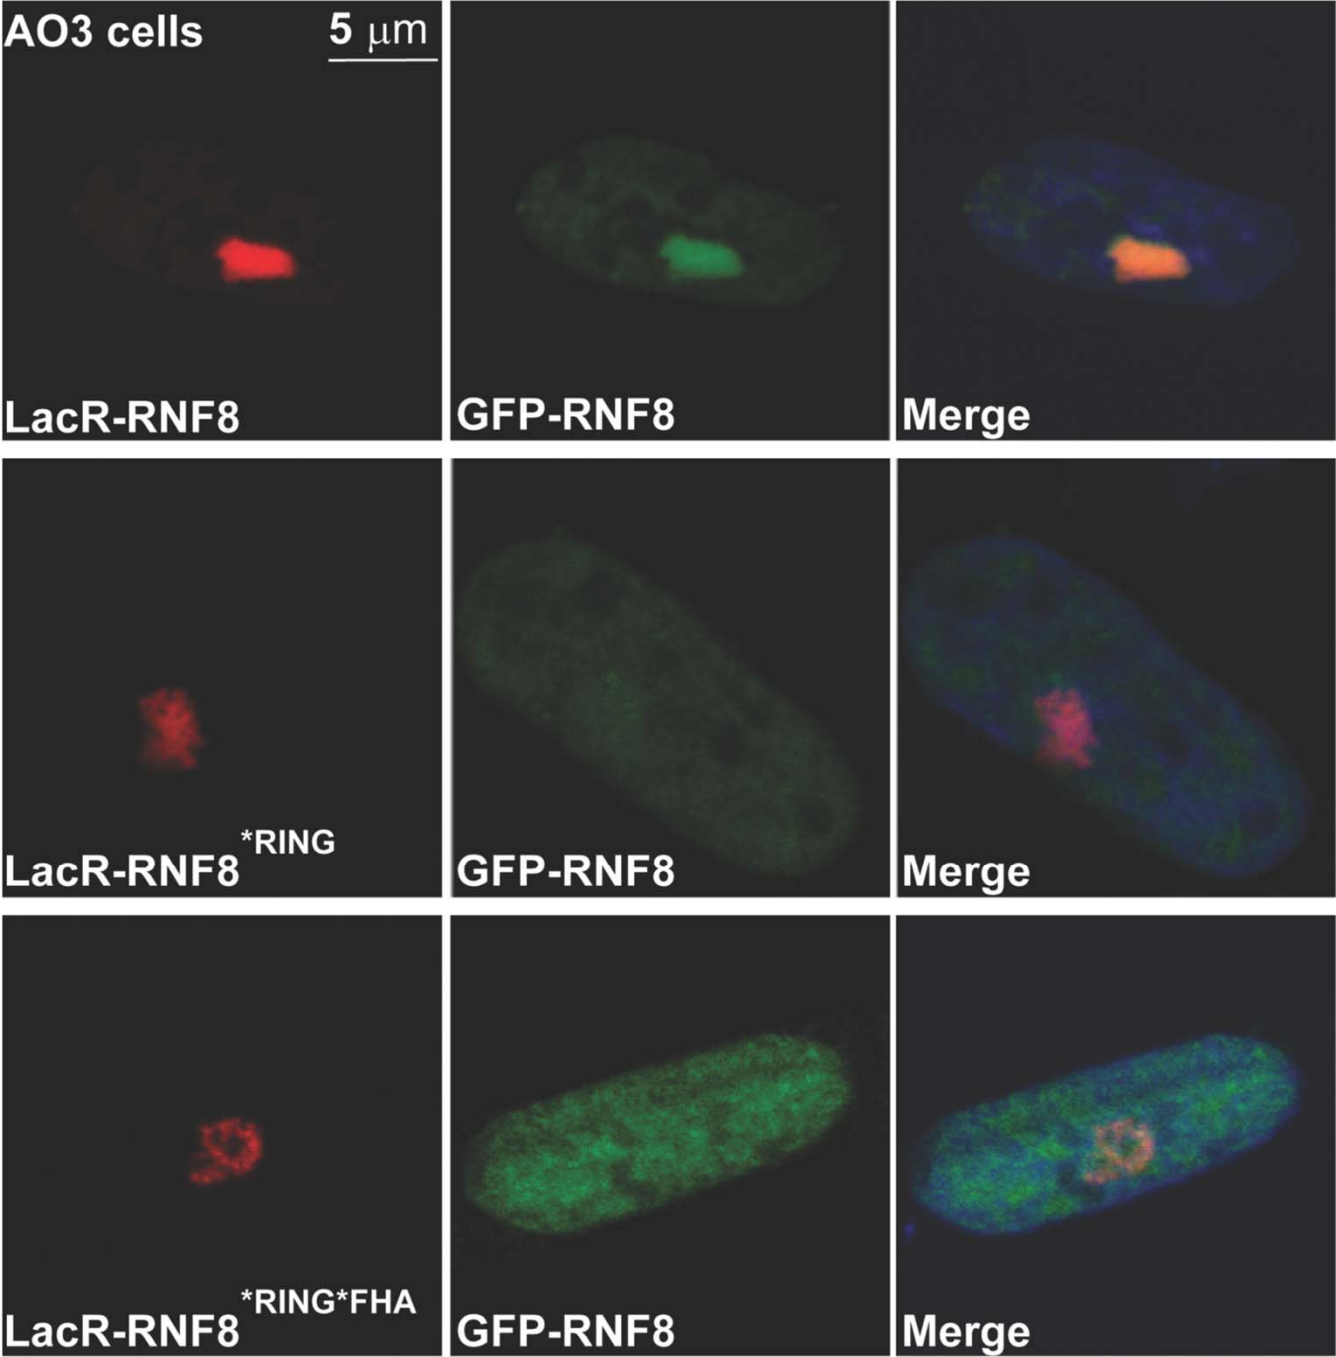

Figure S4

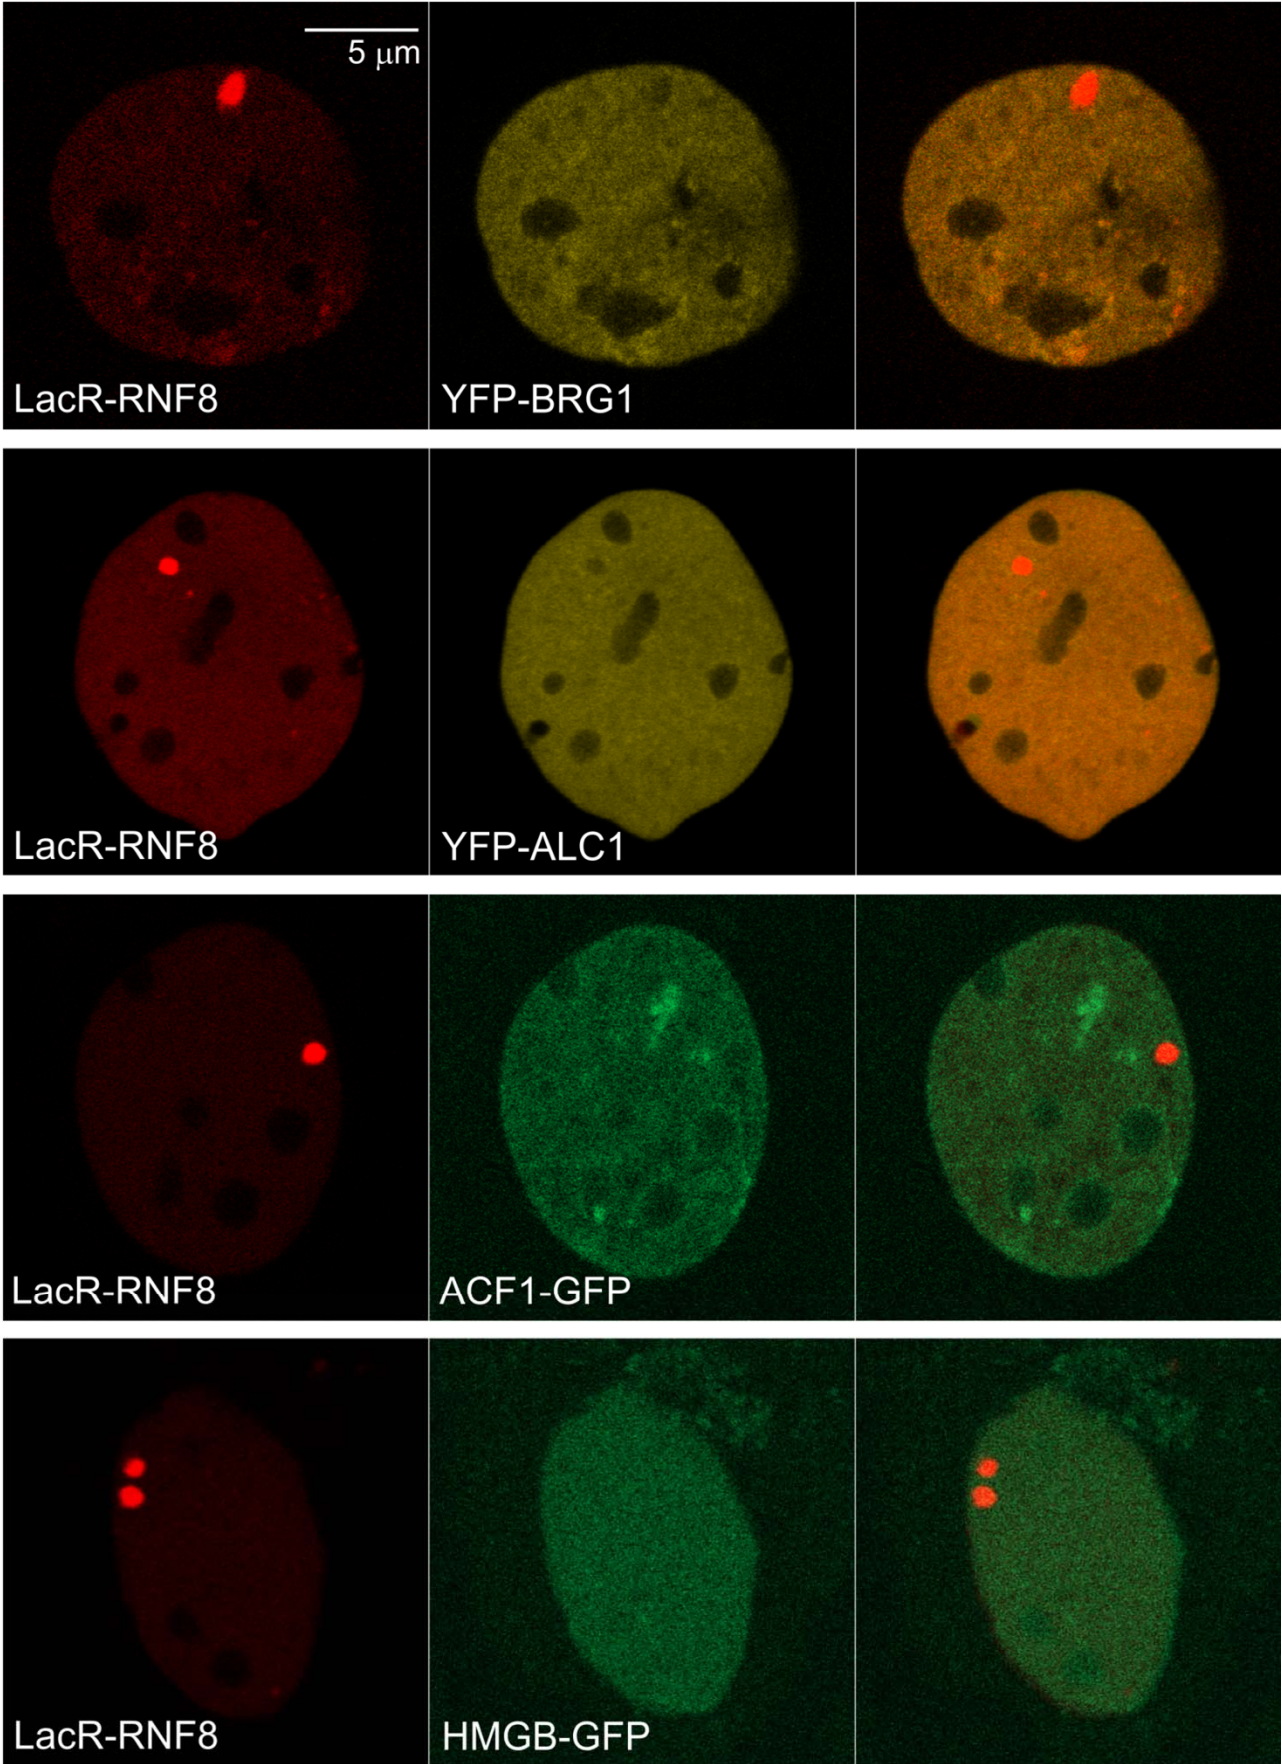

Figure S5

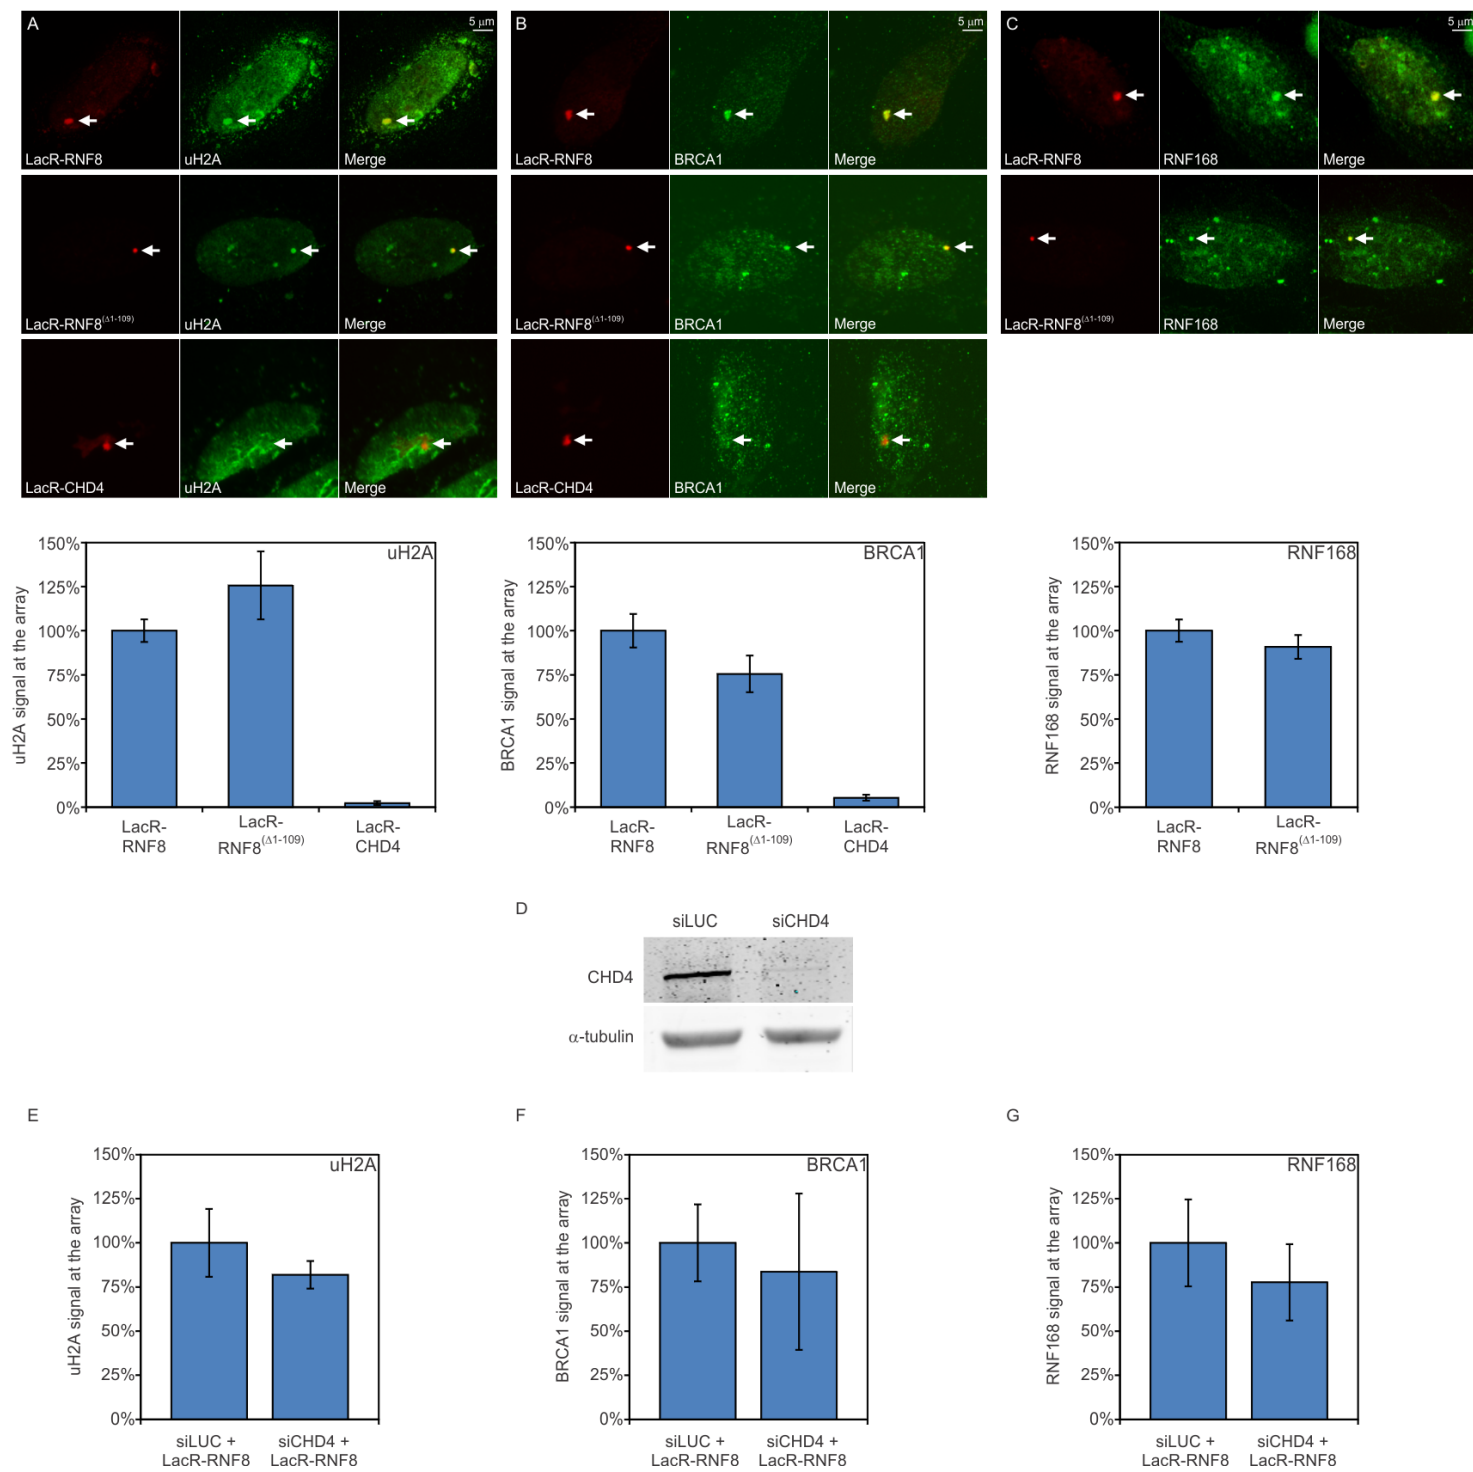

1 **Fig S1. Ubiquitin ligase fusion proteins are functional and mediate ubiquitin conjugation and ubiquitin**  
2 **ligase cross-recruitment.** Recruitment of **A**) mCherry-LacR-RNF8 (red) and **B**) mCherry-LacR-RNF168 (red)  
3 to DSBs inflicted by laser micro-irradiation following BrdU sensitization. The sites of DNA damage are marked  
4 by GFP-MDC1 (green). **C-D**) Tethering mCherry-LacR-RNF2, mCherry-LacR-RNF8 or mCherry-LacR-  
5 RNF168 (shown in red) causes accumulation of **C**) GFP-Ub and **D**) ubiquitin conjugates (FK2) (green) at the  
6 array. **E**) Recruitment of GFP-tagged RNF8 (green) triggered by tethering mCherry-LacR-RNF8 and mCherry-  
7 LacR-RNF8<sup>\*FHA</sup>, but not by mCherry-LacR-RNF8<sup>\*RING</sup>. **F**) Quantification of the percentage of cells with GFP-  
8 RNF8 at the array after tethering the indicated mCherry-LacR-RNF fusion proteins. Values represent the mean  
9 of two independent experiments (n=50 cells). **G**) Recruitment of GFP-tagged MDC1 (green) triggered by  
10 tethering mCherry-LacR-RNF8 and mCherry-LacR-RNF8<sup>\*RING</sup>, but not by mCherry-LacR-RNF8<sup>\*FHA</sup>. **H**)  
11 Quantification of the percentage of cells with GFP-MDC1 at the array after tethering the indicated mCherry-  
12 LacR-RNF fusion proteins. Values represent the mean of two independent experiments (n=50 cells). The scale  
13 bar is 5  $\mu$ m.

14

15 **Fig S2. Immobilization of RNF8 with the rTetR to TetO in U2OS-2-6-3 cells causes decondensation.** U2OS  
16 2-6-3 cells harbouring ~200 copies of a TetO-containing cassette integrated in the genome were transfected with  
17 either GFP-rTetR or GFP-rTetR-RNF8 after which the binding of the rTetR fusion proteins was induced by  
18 treatment with dox for 24hours. The RNF8-mediated chromatin decondensation is quantified as the mean size of  
19 the array (in % of nuclear area) next to the images.

20

21 **Fig S3. Immobilization of RNF8, but not RNF8\*RING, triggers recruitment of GFP-RNF8 to the unfolded**  
22 **array in AO3 cells.** Hamster AO3 cells, harbouring a 90 Mbp array interspersed with LacO sequences, were  
23 transfected with the indicated LacR-RNF8 fusion proteins together with GFP-RNF8. While all RNF8 fusion  
24 proteins unfold the array, only LacR-RNF8<sup>WT</sup> is capable of recruiting GFP-RNF8 to the array, while both LacR-  
25 RNF8<sup>\*RING</sup> and LacR-RNF8<sup>\*RING\*FHA</sup> fail to do so.

26

27 **Fig S4. Various chromatin modifiers are not recruited when tethering RNF8.** NIH2/4 cells were transfected  
28 with mCherry-LacR-RNF8 together with the indicated fluorescent protein-tagged chromatin modifiers. No  
29 apparent recruitment of BRG1, ALC1, ACF1 or HMGB1 by immobilized RNF8 was observed.

30

31 **Fig S5. CHD4 is not required to initiate the DDR upon tethering RNF8 to chromatin. A-C)** U2OS-2-6-3  
32 cells were transfected with the indicated LacR-fusion proteins and stained for **A)** uH2A, **B)** BRCA1, and **C)**  
33 RNF168. Quantification of the percentage of cells with positive signals at the array after tethering the indicated  
34 fusion proteins is shown below the images. **D)** Western blot analysis of U2OS-2-6-3 cells transfected with CHD4  
35 siRNAs. Membranes were probed with antibodies to CHD4 and Tubulin. **E-G)** Quantification of the percentage  
36 of cells with positive signals at the array after tethering LacR-RNF8 in cells transfected with siLUC or siCHD4  
37 and stained for **E)** uH2A, **F)** BRCA1, and **G)** RNF168. Values represent the mean of two independent  
38 experiments (n=20 cells).
