# Supplementary material
Source: PubMed Central journal article supplement (PMC3365417)

**Figure 3H**

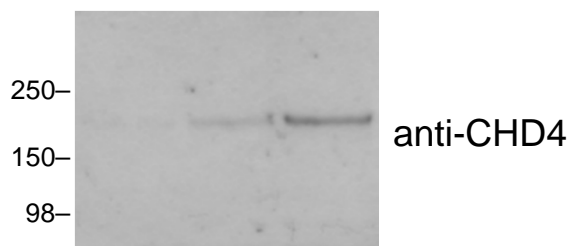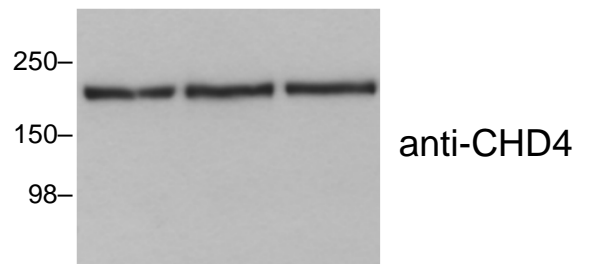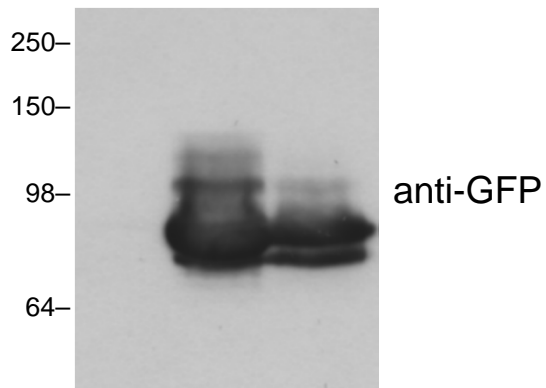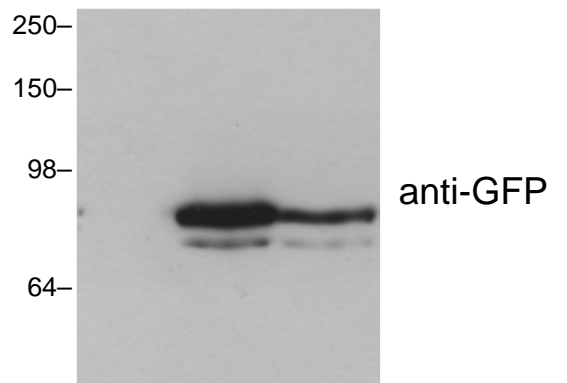

Supplement: emboj2012104s2.pdf [file emboj2012104s2.pdf]

**Figure 3I**

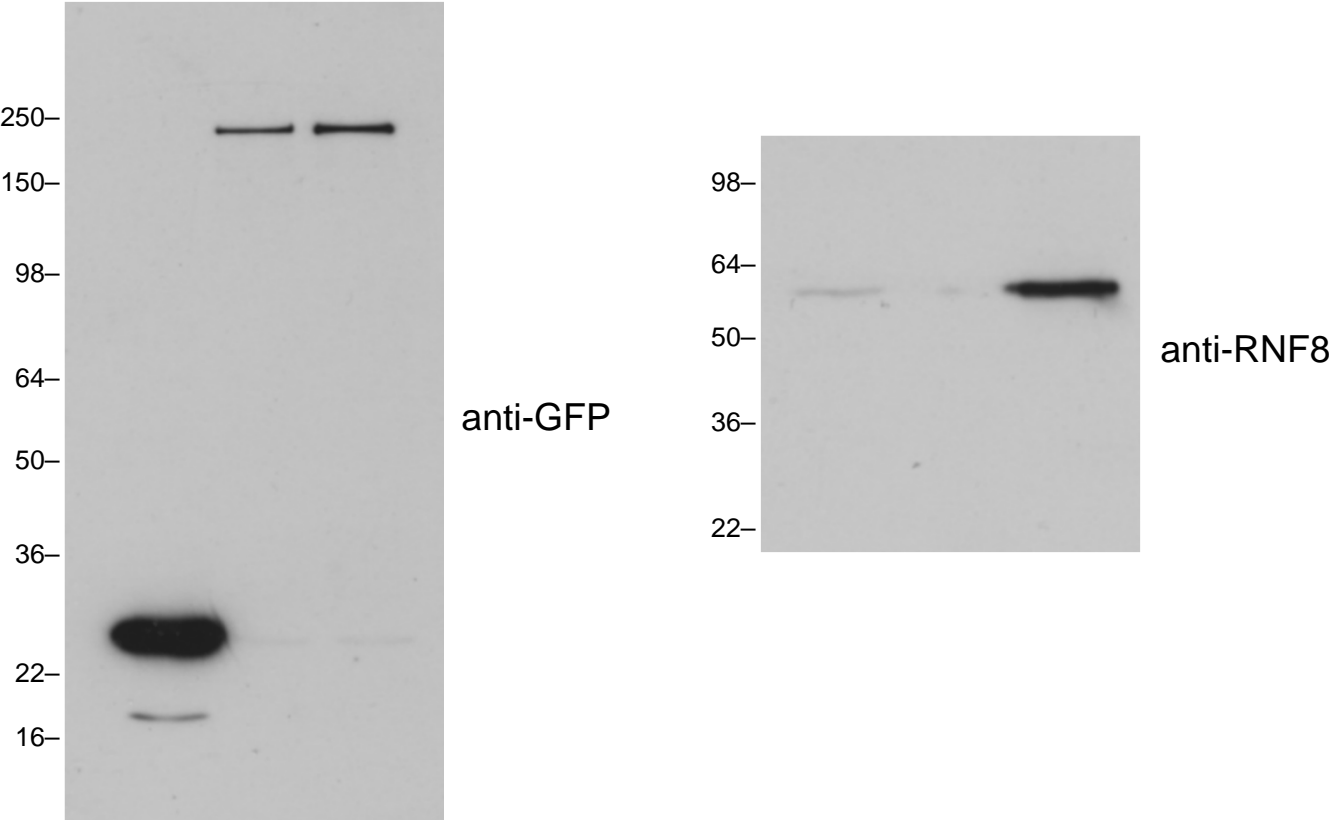

Supplement: emboj2012104s3.pdf [file emboj2012104s3.pdf]

**Figure 3J**

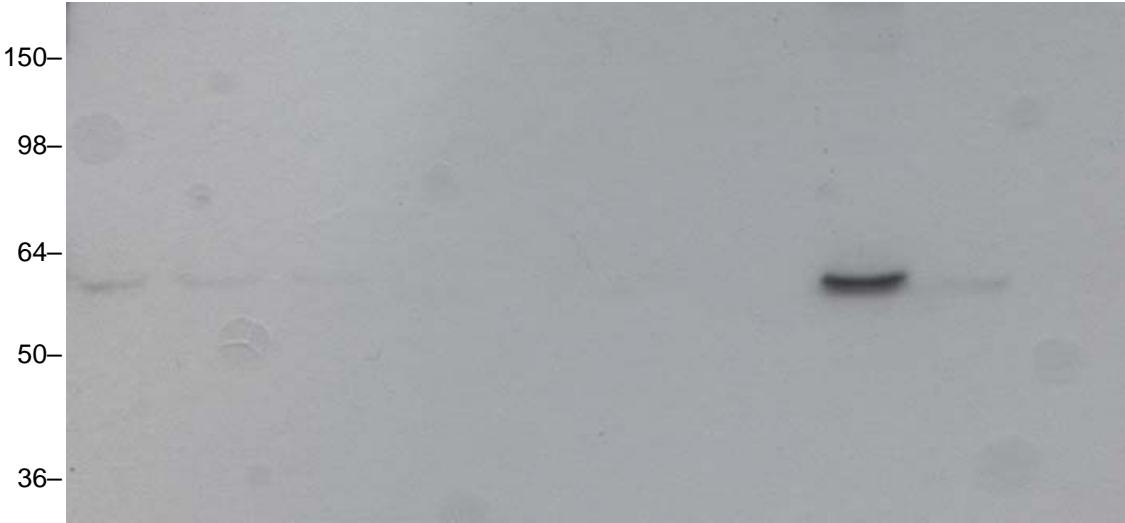

anti-RNF8

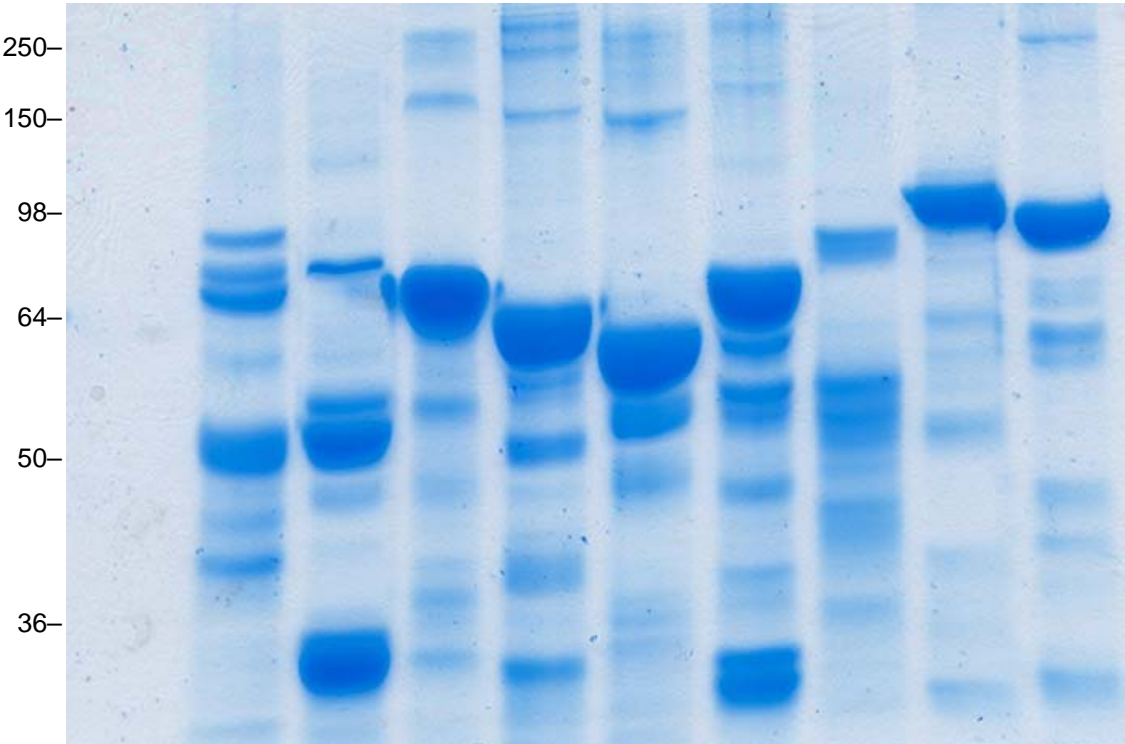

Coomassie

Supplement: emboj2012104s4.pdf [file emboj2012104s4.pdf]

Fig 5G - AO3 cells

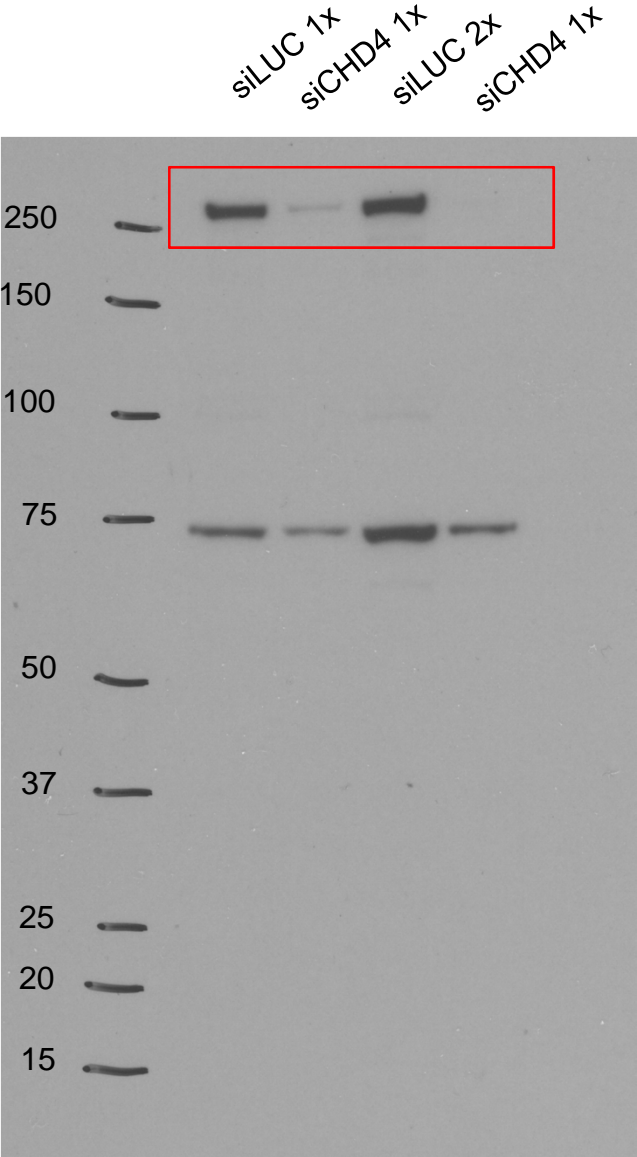

$\alpha$ -CHD4

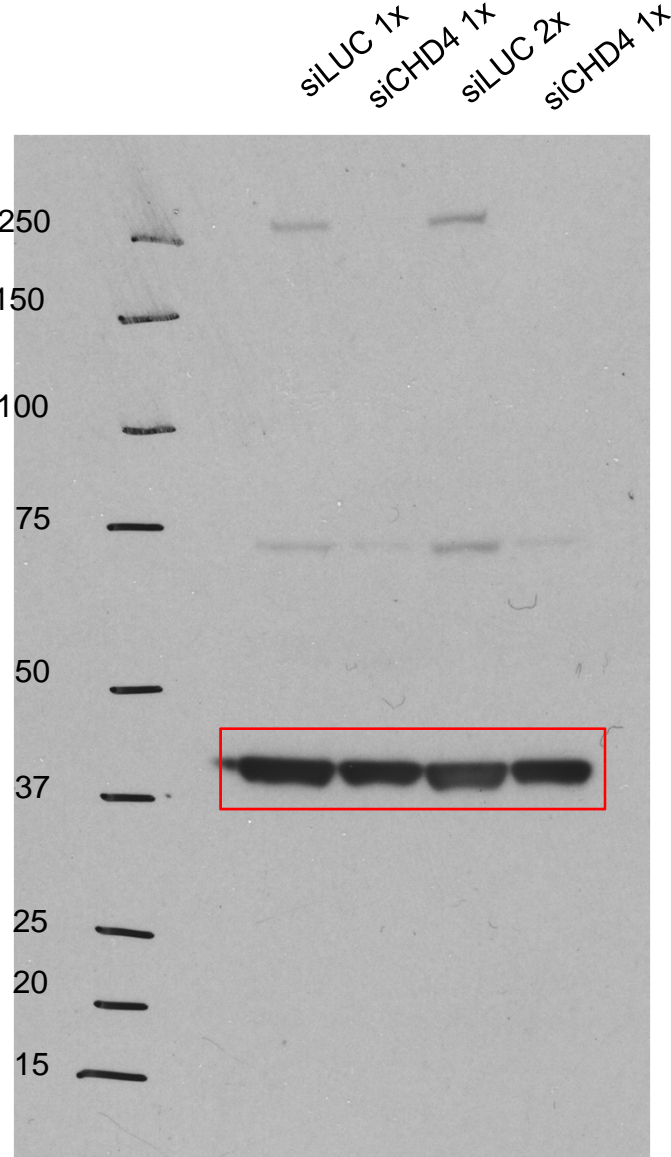

$\alpha$ -Tubulin

Supplement: emboj2012104s5.pdf [file emboj2012104s5.pdf]

Fig 7C – U2OS cells

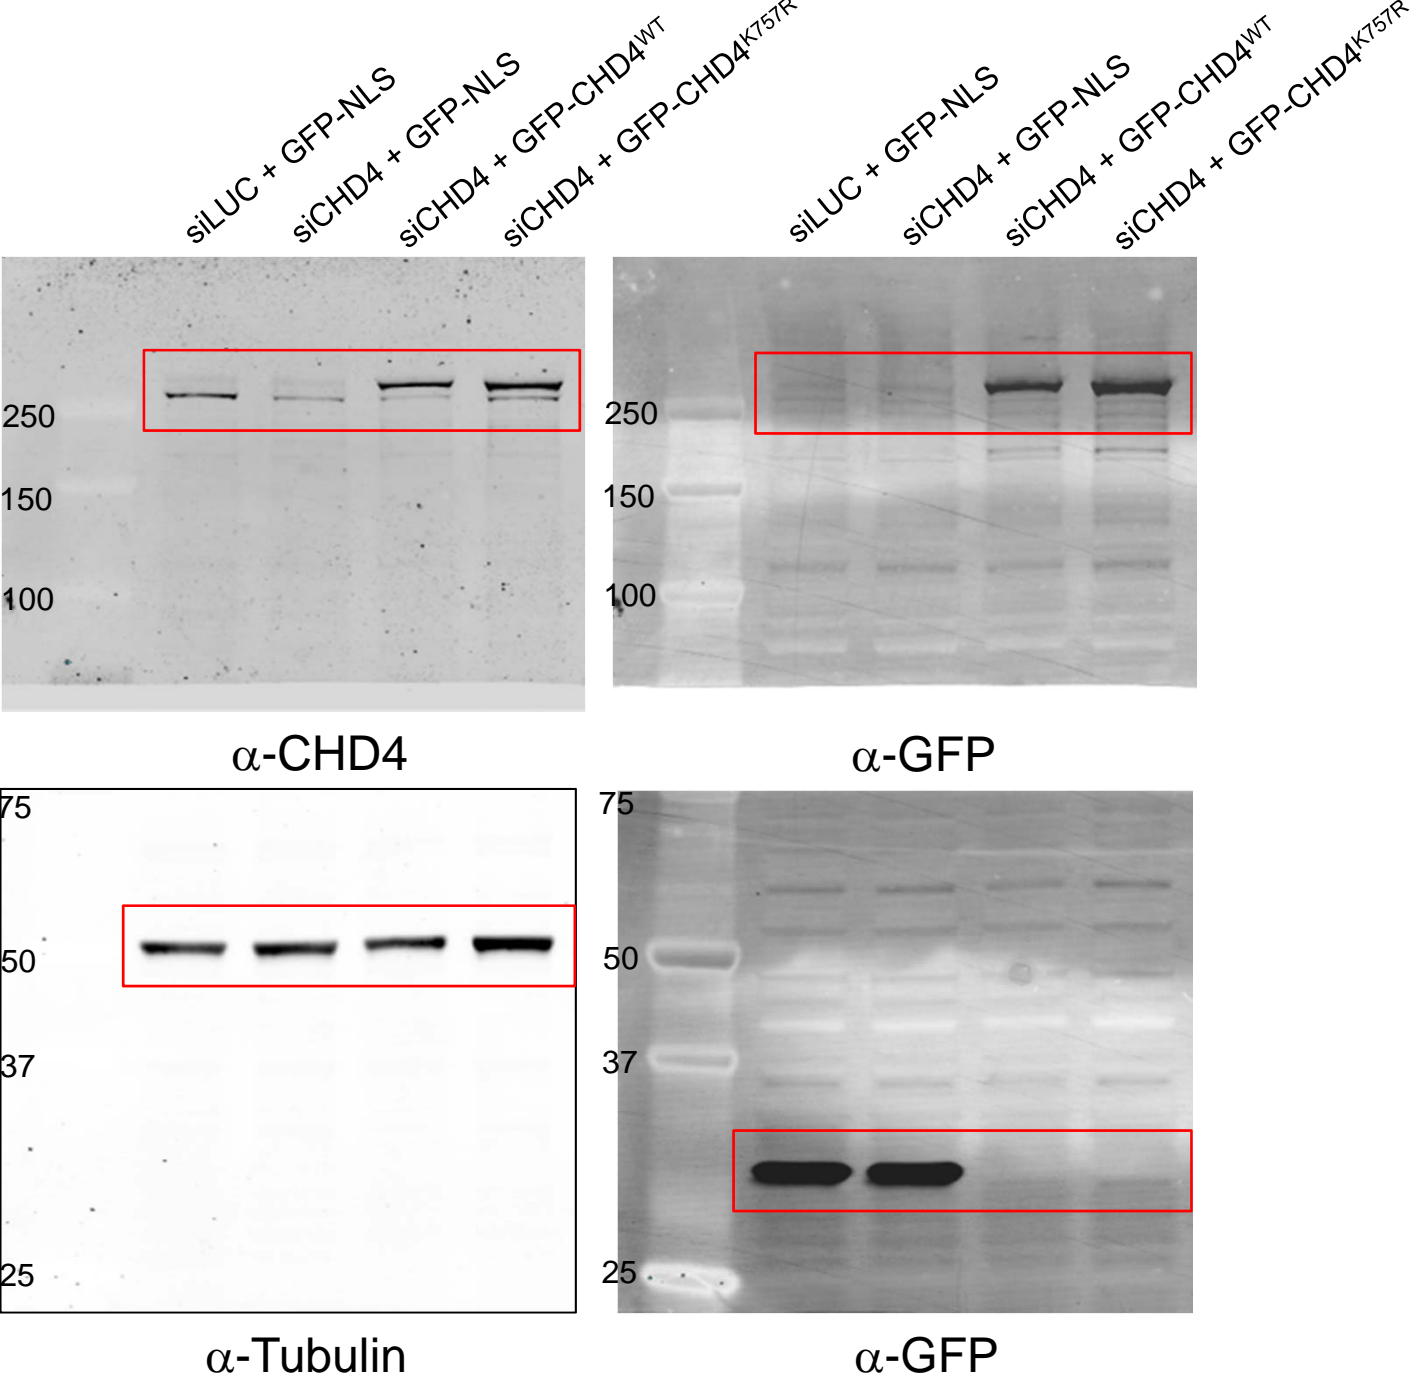

Supplement: emboj2012104s6.pdf [file emboj2012104s6.pdf]

Fig S5D – U2OS cells

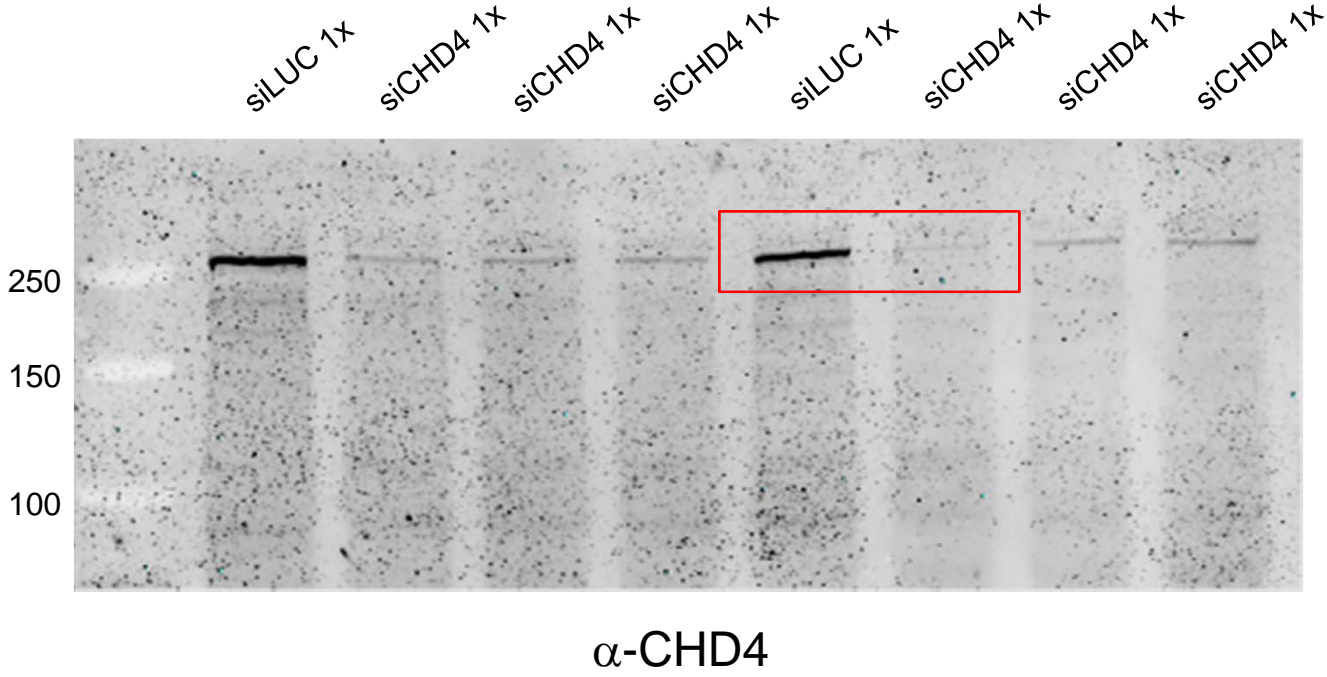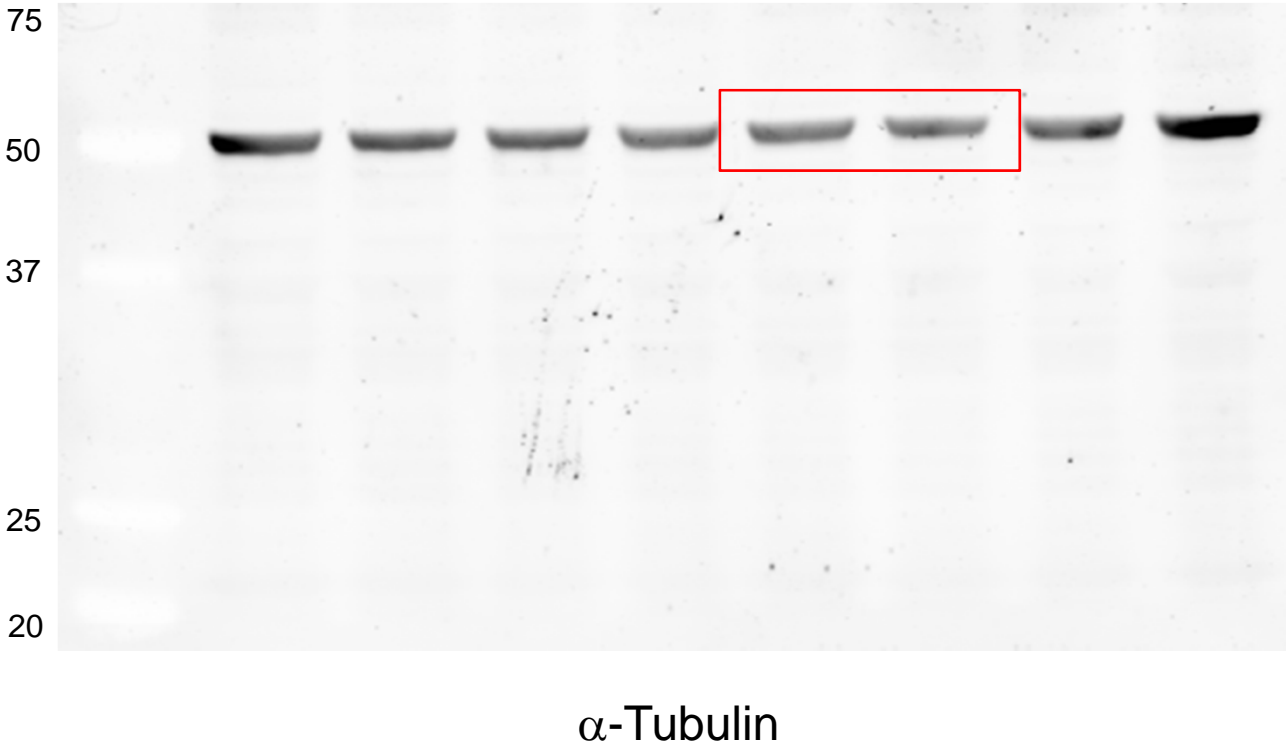

Supplement: emboj2012104s7.pdf [file emboj2012104s7.pdf]
